# Supplementary material
Source: PubMed Central journal article supplement (PMC5010007)
Supplement: NIHMS778760-supplement-supplement_1.pdf [file NIHMS778760-supplement-supplement_1.pdf]

## **Supplemental Materials**

**Supplemental Table 1. Beta Coefficients for the Interactions of Baseline and Change in Lipid Measures and time Relative to FMP on Carotid Intima-Media Thickness among Participants with Known Date of Final menstrual Period, N=131 women / 398 observations**

| HDL-C Measures  | Progression in cIMT,<br>mm/year |         | apoA Measures  | Progression in cIMT,<br>mm/year |         |
|-----------------|---------------------------------|---------|----------------|---------------------------------|---------|
|                 | $\beta$ (SE) <sup>a</sup>       | P value |                | $\beta$ (SE) <sup>b</sup>       | P value |
| <b>Model 1</b>  |                                 |         | <b>Model 1</b> |                                 |         |
| Baseline HDL-C  | -0.002(0.001)                   | 0.04    | Baseline apoA  | -0.002(0.001)                   | 0.02    |
| Change in HDL-C | 0.003(0.001)                    | 0.008   | Change in apoA | 0.002(0.001)                    | 0.08    |
| <b>Model 2</b>  |                                 |         | <b>Model 2</b> |                                 |         |
| Baseline HDL-C  | -0.002(0.001)                   | 0.03    | Baseline apoA  | -0.002(0.001)                   | 0.01    |
| Change in HDL-C | 0.003(0.001)                    | 0.007   | Change in apoA | 0.001(0.001)                    | 0.12    |
| <b>Model 3</b>  |                                 |         | <b>Model 3</b> |                                 |         |
| Baseline HDL-C  | -0.001(0.001)                   | 0.11    | Baseline apoA  | -0.002(0.001)                   | 0.02    |
| Change in HDL-C | 0.003(0.001)                    | 0.004   | Change in apoA | 0.001(0.001)                    | 0.11    |

<sup>a</sup> Beta coefficients represent cIMT progression rate (mm/year) per SD unit of baseline HDL-C (SD=11.96 mg/dL) and change in and change in HDL-C since baseline (6.15 mg/dL)

<sup>b</sup> Beta coefficients represent cIMT progression rate (mm/year) per SD unit of baseline apoA (SD=23.69 mg/dL) and change in apoA since baseline (18.78 mg/dL)

Model 1: Adjusted for baseline age, time since FMP, race and education

Model 2: Adjusted for variables in model 1 plus time varying BMI and SBP

Model 3: Adjusted for variables in model 2 plus LDL-C, current use of CVD medications and log transformed hs-CRP

**Supplemental Table 2. Beta Coefficients for the Interactions of Baseline HDL-C and Change in HDL-C and time Relative to FMP on Carotid Adventitial diameter and Plaque Presence**

| HDL-C Measures  | Progression in cAD, mm/year |         | Presence of cPlaque    |         |
|-----------------|-----------------------------|---------|------------------------|---------|
|                 | $\beta$ (SE) <sup>a</sup>   | P value | OR(95%CI) <sup>b</sup> | P value |
| <b>Model 1</b>  |                             |         |                        |         |
| Baseline HDL-C  | -0.006(0.004)               | 0.14    | 0.99(0.92, 1.06)       | 0.77    |
| Change in HDL-C | -0.005(0.004)               | 0.18    | 0.99(0.93, 1.05)       | 0.74    |
| <b>Model 2</b>  |                             |         |                        |         |
| Baseline HDL-C  | -0.005(0.004)               | 0.25    | 1.01(0.95, 1.08)       | 0.73    |
| Change in HDL-C | -0.006(0.004)               | 0.11    | 0.99(0.933, 1.06)      | 0.80    |
| <b>Model 3</b>  |                             |         |                        |         |
| Baseline HDL-C  | -0.006(0.004)               | 0.20    | 1.02(0.95, 1.09)       | 0.62    |
| Change in HDL-C | -0.006(0.004)               | 0.11    | 0.99(0.93, 1.06)       | 0.84    |

<sup>a</sup> Beta coefficients represent AD progression rate (mm/year) per SD unit of baseline HDL-C (SD=11.96 mg/dL) and change in HDL-C since baseline (6.15 mg/dL). For AD n=206 women/501 observations.

<sup>b</sup> OR(95%CI) represents increases in odds of plaque presence per SD unit of baseline HDL-C (SD=11.96 mg/dL) and change in HDL-C since baseline (6.15 mg/dL) by time since FMP. For plaque n=213 women/531

observations.

Model 1: Adjusted for baseline age , time since FMP, race and education

Model 2: Adjusted for variables in model 1 plus time varying BMI and SBP

Model 3: Adjusted for variables in model 2 plus LDL-C, current use of CVD medications and logtransformed

hs-CRP

**Supplemental Table 3. . Beta Coefficients for the Interactions of Baseline apoA and Change in apoA and time Relative to FMP on Carotid Adventitial diameter and Plaque Presence**

| apoA Measures  | Progression in cAD, mm/year |         | Presence of cPlaque    |         |
|----------------|-----------------------------|---------|------------------------|---------|
|                | $\beta$ (SE) <sup>a</sup>   | P value | OR(95%CI) <sup>b</sup> | P value |
| <b>Model 1</b> |                             |         |                        |         |
| Baseline apoA  | -0.003(0.005)               | 0.56    | 0.99(0.93, 1.05)       | 0.68    |
| Change in apoA | 0.002(0.004)                | 0.68    | 0.95(0.90, 0.99)       | 0.04    |
| <b>Model 2</b> |                             |         |                        |         |
| Baseline apoA  | -0.003(0.005)               | 0.55    | 1.00(0.95, 1.07)       | 0.91    |
| Change in apoA | 0.002(0.004)                | 0.58    | 0.95(0.90, 1.00)       | 0.06    |
| <b>Model 3</b> |                             |         |                        |         |
| Baseline apoA  | -0.003(0.005)               | 0.55    | 1.01(0.95, 1.07)       | 0.82    |
| Change in apoA | 0.002(0.004)                | 0.55    | 0.95(0.91, 1.00)       | 0.07    |

<sup>a</sup> Beta coefficients represent AD progression rate (mm/year) per SD unit of baseline apoA (SD=23.69 mg/dL) and change in apoA since baseline (18.78 mg/dL). For AD n=206 women/501 observations.

<sup>b</sup> OR(95%CI) represents increases in odds of plaque presence per SD unit of baseline apoA (SD=23.69 mg/dL) and change in apoA since baseline (18.78 mg/dL) by time since FMP. For plaque n=213

women/531 observations.

Model 1: Adjusted for baseline age, time since FMP, race and education

Model 2: Adjusted for variables in model 1 plus time varying BMI and SBP

Model 3: Adjusted for variables in model 2 plus LDL-C, current use of CVD medications and log transformed  
hs-CRP
